# Supplementary material
Source: publisher figshare collection journal article supplement (https://sage.figshare.com/ndownloader/files/13124717)
Supplement: Supplementary file 1 [file 13124717]

# Online Supplement 1. Cancer worries and uptake of breast, cervical, and colorectal cancer screening: a population-based survey in England

(Samantha L Quaife, Jo Waller, Christian von Wagner, Charlotte Vrinten)

| Weighted response distributions for general cancer worry and specific worries, for all three subsamples |                          |                            |                         |
|---------------------------------------------------------------------------------------------------------|--------------------------|----------------------------|-------------------------|
|                                                                                                         | Breast<br>N=329<br>N (%) | Cervical<br>N=650<br>N (%) | Bowel<br>N=326<br>N (%) |
| <b>General cancer worry (frequency)</b>                                                                 |                          |                            |                         |
| How often do you worry about your chances of getting cancer?                                            |                          |                            |                         |
| Never                                                                                                   | 108 (32.9)               | 187 (28.7)                 | 143 (43.8)              |
| Occasionally                                                                                            | 125 (37.9)               | 241 (37.0)                 | 118 (36.4)              |
| Sometimes                                                                                               | 72 (21.7)                | 159 (24.4)                 | 52 (16.1)               |
| Often                                                                                                   | 21 (6.2)                 | 51 (7.8)                   | 9 (2.8)                 |
| Very often                                                                                              | 4 (1.2)                  | 13 (2.0)                   | 3 (0.9)                 |
| <b>Specific cancer worries (intensity)</b>                                                              |                          |                            |                         |
| <i>Worries about the emotional and physical consequences</i>                                            |                          |                            |                         |
| If you were diagnosed with cancer, would you worry that...                                              |                          |                            |                         |
| 1. you would require surgery?                                                                           |                          |                            |                         |
| Not at all                                                                                              | 65 (19.8)                | 101 (15.6)                 | 72 (22.1)               |
| Slightly                                                                                                | 85 (25.9)                | 167 (25.7)                 | 92 (28.2)               |
| Quite a bit                                                                                             | 116 (35.4)               | 217 (33.4)                 | 109 (33.5)              |
| Extremely                                                                                               | 62 (19.0)                | 165 (25.3)                 | 53 (16.3)               |
| 2. it would upset you emotionally?                                                                      |                          |                            |                         |
| Not at all                                                                                              | 28 (8.5)                 | 46 (7.1)                   | 44 (13.5)               |
| Slightly                                                                                                | 84 (25.4)                | 135 (20.8)                 | 87 (26.7)               |
| Quite a bit                                                                                             | 110 (33.6)               | 205 (31.6)                 | 124 (38.1)              |
| Extremely                                                                                               | 107 (32.6)               | 264 (40.6)                 | 71 (21.7)               |
| 3. you would require chemotherapy?                                                                      |                          |                            |                         |
| Not at all                                                                                              | 57 (17.3)                | 83 (12.7)                  | 74 (22.8)               |
| Slightly                                                                                                | 71 (21.7)                | 135 (20.8)                 | 70 (21.6)               |
| Quite a bit                                                                                             | 124 (37.8)               | 239 (36.7)                 | 121 (37.2)              |
| Extremely                                                                                               | 76 (23.2)                | 193 (29.7)                 | 60 (18.5)               |
| 4. you would require radiation treatment?                                                               |                          |                            |                         |
| Not at all                                                                                              | 72 (22.0)                | 103 (15.9)                 | 82 (25.2)               |
| Slightly                                                                                                | 82 (24.8)                | 160 (24.6)                 | 86 (26.4)               |
| Quite a bit                                                                                             | 121 (36.7)               | 225 (34.7)                 | 112 (34.4)              |
| Extremely                                                                                               | 54 (16.6)                | 161 (24.8)                 | 46 (14.0)               |
| 5. it would make you feel that you don't have control over your life?                                   |                          |                            |                         |
| Not at all                                                                                              | 76 (23.0)                | 105 (16.1)                 | 78 (23.8)               |
| Slightly                                                                                                | 106 (32.2)               | 173 (26.6)                 | 113 (34.7)              |
| Quite a bit                                                                                             | 93 (28.3)                | 195 (30.0)                 | 97 (29.9)               |
| Extremely                                                                                               | 54 (16.5)                | 177 (27.2)                 | 38 (11.6)               |
| 6. it would threaten your life?                                                                         |                          |                            |                         |
| Not at all                                                                                              | 49 (14.8)                | 67 (10.3)                  | 53 (16.4)               |
| Slightly                                                                                                | 65 (19.6)                | 112 (17.2)                 | 60 (18.4)               |
| Quite a bit                                                                                             | 120 (36.5)               | 215 (33.1)                 | 136 (41.8)              |
| Extremely                                                                                               | 96 (29.1)                | 257 (39.5)                 | 76 (23.5)               |
| <i>Worries about the social consequences</i>                                                            |                          |                            |                         |
| If you were diagnosed with cancer, would you worry that...                                              |                          |                            |                         |
| 7. it would make you feel less of a (wo)man?                                                            |                          |                            |                         |
| Not at all                                                                                              | 202 (61.5)               | 330 (50.8)                 | 218 (66.9)              |
| Slightly                                                                                                | 70 (21.3)                | 165 (25.3)                 | 69 (21.0)               |
| Quite a bit                                                                                             | 43 (13.0)                | 105 (16.2)                 | 29 (9.0)                |
| Extremely                                                                                               | 13 (4.1)                 | 49 (7.6)                   | 10 (3.0)                |
| 8. it would interfere with your sense of sexuality?                                                     |                          |                            |                         |
| Not at all                                                                                              | 181 (54.9)               | 280 (43.0)                 | 193 (59.4)              |
| Slightly                                                                                                | 82 (25.0)                | 174 (26.8)                 | 76 (23.4)               |
| Quite a bit                                                                                             | 49 (15.0)                | 132 (20.4)                 | 45 (13.9)               |
| Extremely                                                                                               | 17 (5.1)                 | 64 (9.9)                   | 11 (3.3)                |

|                                                               |            |            |            |  |
|---------------------------------------------------------------|------------|------------|------------|--|
| 9. it would threaten your identity?                           |            |            |            |  |
| Not at all                                                    | 172 (52.3) | 251 (38.6) | 185 (56.6) |  |
| Slightly                                                      | 85 (25.7)  | 178 (27.4) | 84 (25.9)  |  |
| Quite a bit                                                   | 54 (16.5)  | 147 (22.6) | 43 (13.3)  |  |
| Extremely                                                     | 18 (5.5)   | 74 (11.3)  | 14 (4.2)   |  |
| 10. it would hurt your relationships with friends and family? |            |            |            |  |
| Not at all                                                    | 175 (53.2) | 272 (41.8) | 193 (59.2) |  |
| Slightly                                                      | 83 (25.1)  | 173 (26.6) | 85 (26.0)  |  |
| Quite a bit                                                   | 44 (13.3)  | 131 (20.1) | 36 (11.1)  |  |
| Extremely                                                     | 28 (8.4)   | 75 (11.5)  | 12 (3.8)   |  |
| 11. it would cause financial problems for you?                |            |            |            |  |
| Not at all                                                    | 100 (30.4) | 121 (18.6) | 147 (45.1) |  |
| Slightly                                                      | 101 (30.8) | 181 (27.8) | 93 (28.4)  |  |
| Quite a bit                                                   | 88 (26.8)  | 195 (30.0) | 61 (18.7)  |  |
| Extremely                                                     | 40 (12.0)  | 153 (23.5) | 25 (7.8)   |  |
| 12. it would keep you from fulfilling important roles?        |            |            |            |  |
| Not at all                                                    | 85 (26.0)  | 121 (18.6) | 101 (31.0) |  |
| Slightly                                                      | 113 (34.2) | 171 (26.2) | 112 (34.4) |  |
| Quite a bit                                                   | 81 (24.7)  | 205 (31.6) | 81 (24.9)  |  |
| Extremely                                                     | 50 (15.1)  | 153 (23.6) | 32 (9.7)   |  |
